# Supplementary material for: A Protein/Lipid Preload Attenuates Glucose-Induced Endothelial Dysfunction in Individuals with Abnormal Glucose Tolerance
Source: MDPI journal article supplement (doi:10.3390/nu12072053), 2020-07-10
Supplement: s1 [file s1]

## Supplementary Materials

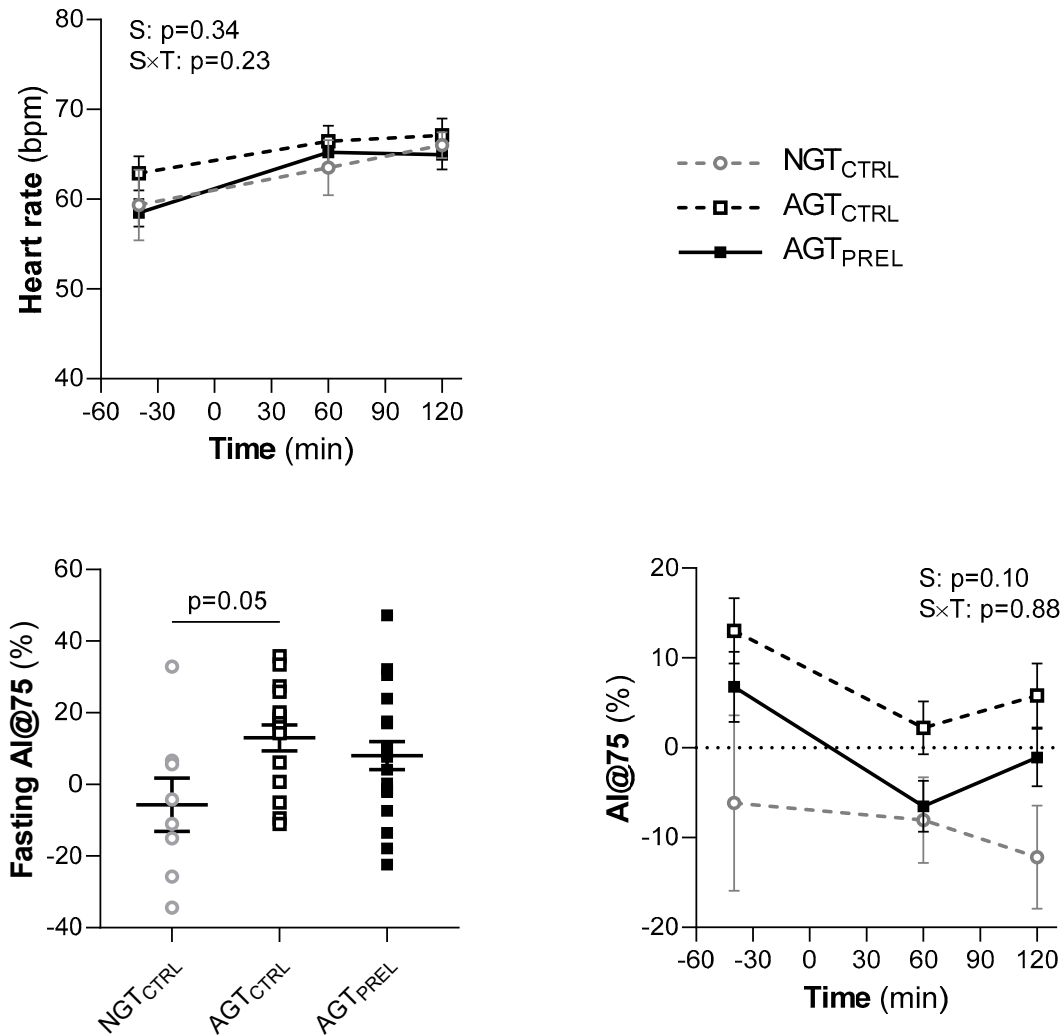

**Figure S1.** Heart rate, fasting arterial stiffness assessed by the augmentation index normalized to heart rate of 75 bpm (AI@75) and changes in AI@75 during two 75 g oral glucose tolerance tests preceded by water (CTRL) or a high-protein/non-carbohydrate preload (PREL) in subjects with normal glucose tolerance (NGT) or abnormal glucose tolerance (AGT). Data are mean  $\pm$  SEM. Baseline group differences were tested by Kruskal–Wallis test followed by post-hoc pairwise comparisons. Repeated measures in AGT were analyzed by mixed models including study (S), time (T), and an interaction term (S×T) as fixed effects and subject as random effect. P values for time effects are not shown (<0.05 for all variables).
